# Supplementary material
Source: MDPI journal article supplement (https://www.mdpi.com/2072-4292/14/1/86)
Supplement: s1 [file s1 › remotesensing-1492167-supplementary.pdf]

## Supplementary Information for

# **Enhanced warming in drylands lake and its driver**

### **Contents of this file**

#### **Table S1**

#### **Figs. S1–S2**

### **Introduction**

This supplementary information section includes the details about list of 9 CMIP6 models and 2 figures that support the results discussed in the main text.

**Table S1 List of 9 CMIP6 models in this study**

| <b>Model name</b> | <b>Modeling center</b>                                                                                      | <b>Spatial resolution</b> |
|-------------------|-------------------------------------------------------------------------------------------------------------|---------------------------|
| CanESM5           | Canadian Centre for Climate<br>Modelling and Analysis,<br>Environment and Climate<br>Change Canada, Canada  | 128×64                    |
| CESM2-WACCM       | National Center for<br>Atmospheric Research,<br>Climate and Global<br>Dynamics Laboratory, United<br>States | 288×192                   |
| EC-Earth3         | European Center-Earth-<br>Consortium, Europe                                                                | 512×256                   |
| INM-CM5-0         | Institute for Numerical<br>Mathematics, Russia                                                              | 180×120                   |
| IPSL-CM6A-LR      | Institute Pierre Simon<br>Laplace, France                                                                   | 144×143                   |
| MIROC6            | Atmosphere and Ocean<br>Research Institute, Japan                                                           | 256×128                   |
| MPI-ESM1-2-LR     | Max Planck Institute for<br>Meteorology, Germany                                                            | 192×96                    |
| MRI-ESM2-0        | Meteorological Research<br>Institute, Japan                                                                 | 320×160                   |
| NorESM2-LM        | Norwegian Climate Center,<br>Norway                                                                         | 144×96                    |

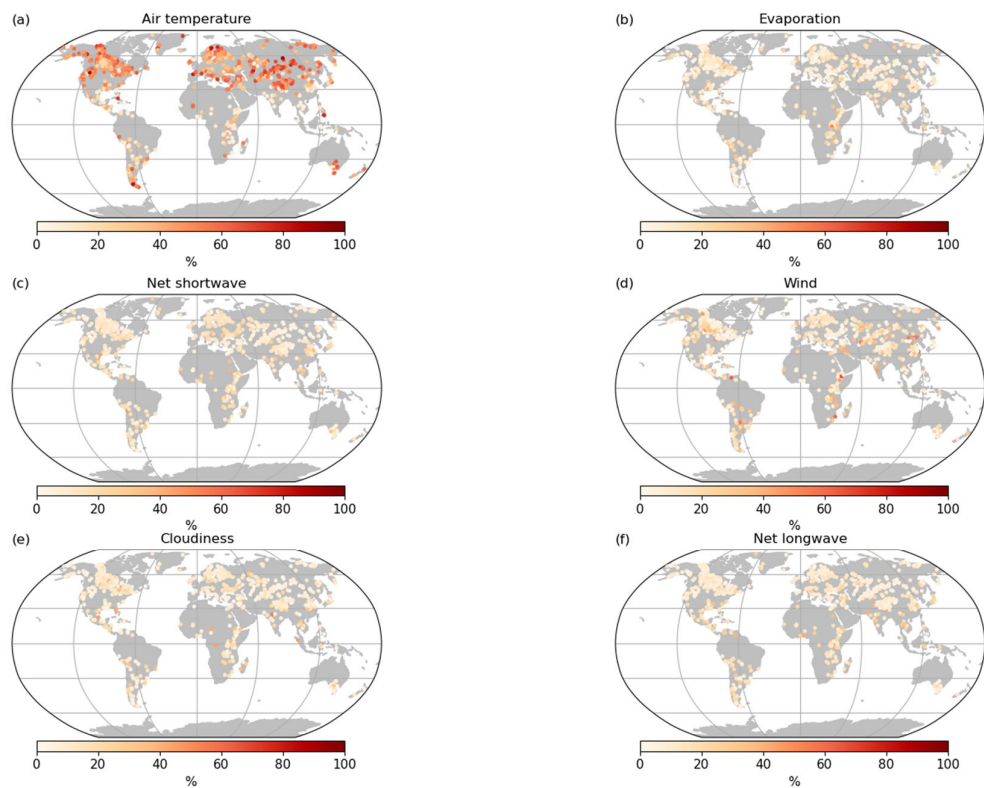

Figure S1. Relative contribution of air temperature (a), evaporation (b), net shortwave radiation (c), wind (d), cloudiness (e) and net longwave radiation (f) to the summer warming trend in global lakes.

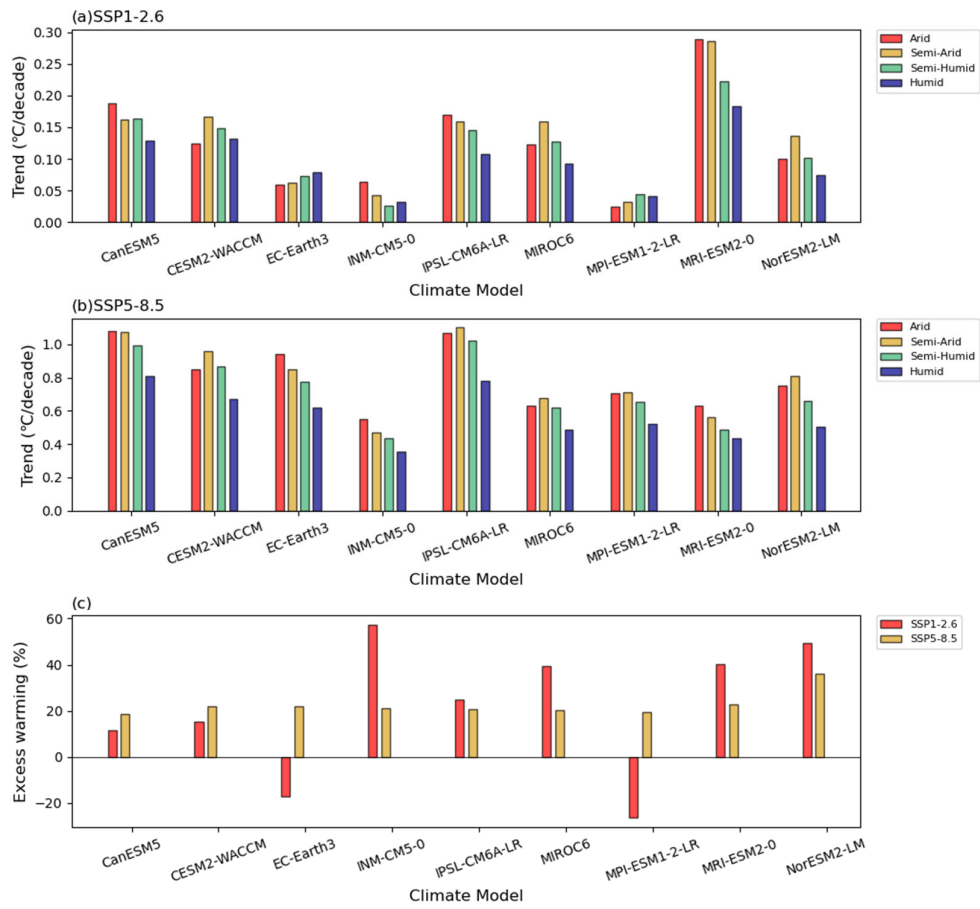

Figure S2. The summer air temperature trends of lakes in four climate zones under the SSP1-2.6 (a) and SSP5-8.5 (b) scenarios with 9 CMIP6 models. (c) Excess warming for each model under the SSP1-2.6 and SSP5-8.5 scenarios. Excess warming is calculated as  $(\text{trend\_drylands} - \text{trend\_humidsemihumid}) / \text{trend\_humidsemihumid} * 100$ .
